# Supplementary material for: Involvement of the MetO/Msr System in Two Acer Species That Display Contrasting Characteristics during Germination
Source: MDPI journal article supplement (doi:10.3390/ijms21239197), 2020-12-02

## Figure S1

SDS-PAGE representative gels of protein extracts (20  $\mu$ g) isolated from embryonic axes and cotyledons of Norway maple (A) and sycamore (B) seeds further used for Western blot analyses. Analyses concerned proteins originating from D-dry seeds, I - imbibed seeds, stratified seeds collected at 2- and 3-weeks intervals and G- germinated seeds with visible elongated radicle. The Spectra<sup>TM</sup> Multicolor Broad Range Protein Ladder marker (Thermo Scientific) was used to calculate the molecular weight. Gels were documented with using G:BOX Chemi XR5 instrument (Syngene, Cambridge, UK) and Coomassie Blue filter settings.

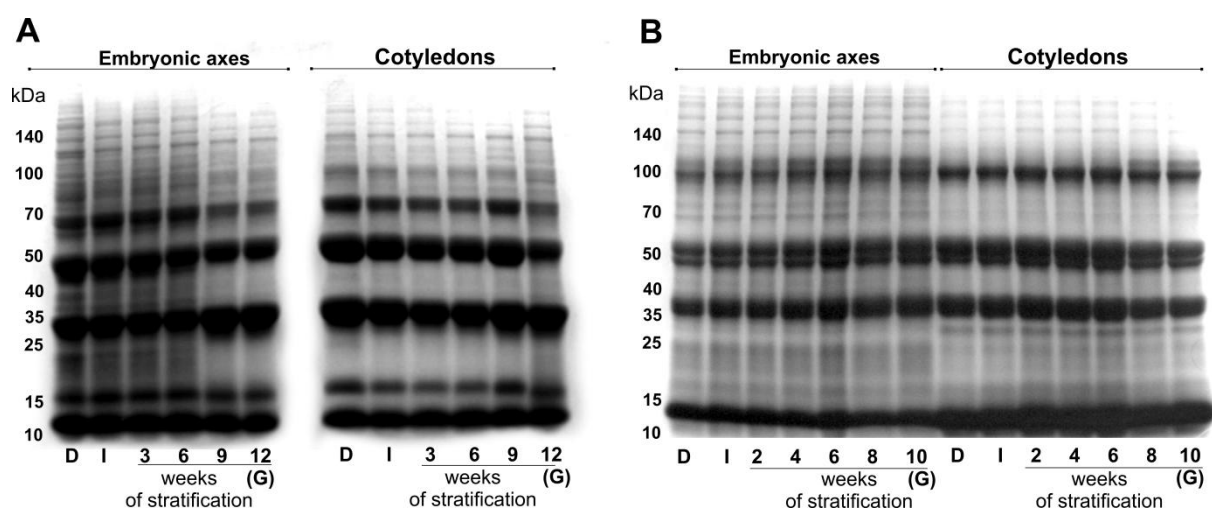

Supplement: s1 [file s1]
